# Supplementary figures and images for: In situ structural analysis with a SAXS laboratory beamline on a microfluidic chip
Source: Royal Society of Chemistry journal article supplement (doi:10.1039/d3lc00362k), 2023-01-01

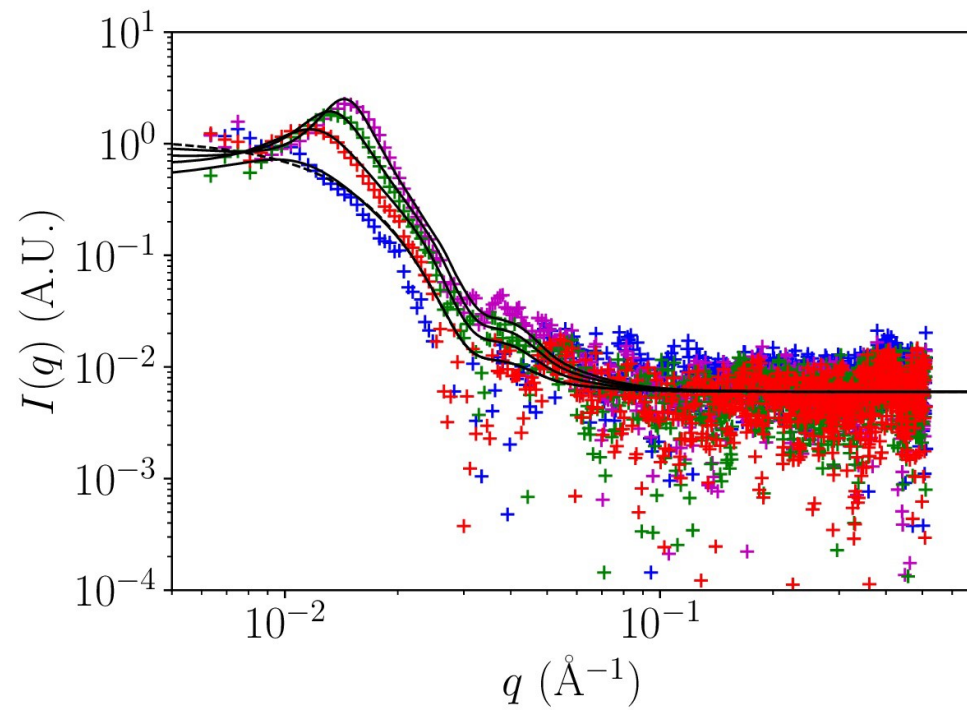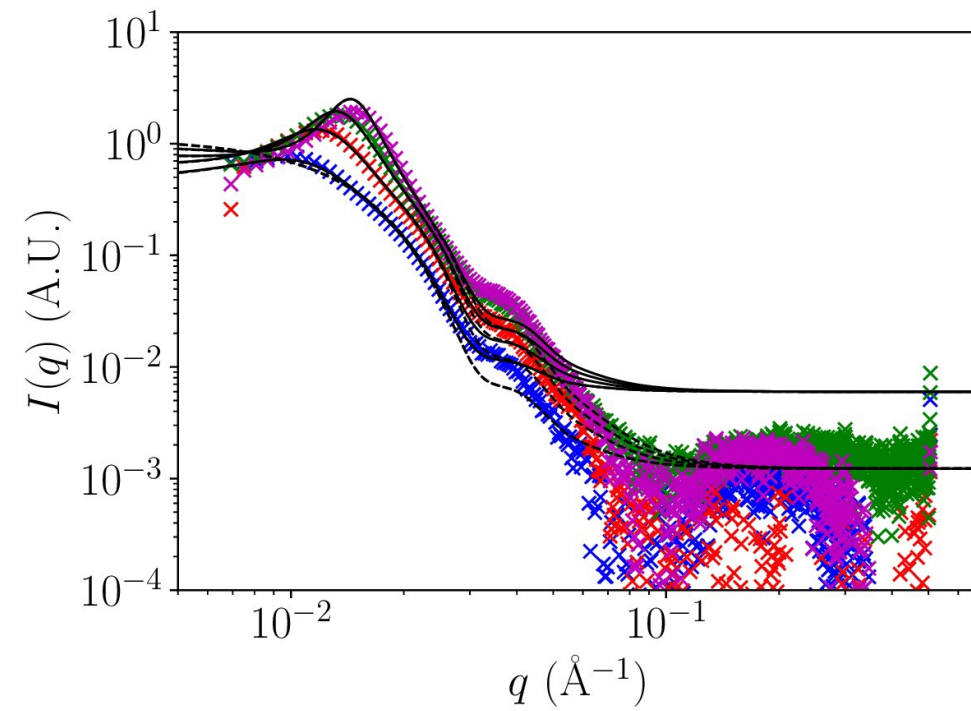

Supplement: d3lc00362k3.pdf [file d3lc00362k3.pdf]
